# Supplementary material for: Neonatal Development in Prenatally Zika Virus-Exposed Infant Macaques with Dengue Immunity
Source: MDPI journal article supplement (doi:10.3390/v13091878), 2021-09-20
Supplement: s1 [file s1]

## Supplemental Information

Supplemental Table S1. Infant demographics and social

| Infant ID | Group     | Sex    | Days in nursery (alone or with peer) | Final social group   | Final social group explanation                                                                                                     |
|-----------|-----------|--------|--------------------------------------|----------------------|------------------------------------------------------------------------------------------------------------------------------------|
| 044-507   | Control   | Female | 6 days                               | Mother (surrogate)   | Biological mother rejected infant                                                                                                  |
| 044-505   | Control   | Female | 4 days                               | Mother (surrogate)   | Biological mother rejected infant                                                                                                  |
| 044-506   | Control   | Female | 29 days                              | Nursery (peer group) | Biological mother and surrogate mother rejected infant. Placed in peer group with colony infants.                                  |
| 044-508   | Control   | Female | 0 days                               | Mother (biological)  |                                                                                                                                    |
| 044-504   | ZIKV      | Female | 1 day                                | Mother (surrogate)   | Biological mother rejected infant                                                                                                  |
| 044-503   | ZIKV      | Male   | 5 days                               | Mother (biological)  |                                                                                                                                    |
| 044-502   | ZIKV      | Male   | 27 days                              | Nursery (peer group) | Biological mother rejected the infant and no surrogates available.                                                                 |
| 044-501   | ZIKV      | Male   | 1 day                                | Mother (biological)  |                                                                                                                                    |
| 044-509   | ZIKV      | Male   | 0 days                               | Mother (biological)  |                                                                                                                                    |
| 042-502   | DENV/ZIKV | Female | 5 days                               | Mother (surrogate)   | Biological mother rejected infant                                                                                                  |
| 042-504   | DENV/ZIKV | Female | 1 day                                | Mother (biological)  |                                                                                                                                    |
| 042-501   | DENV/ZIKV | Male   | 0 days                               | Mother (biological)  |                                                                                                                                    |
| 042-503   | DENV/ZIKV | Female | 15 days                              | Mother (surrogate)   | Biological mother rejected infant. Placed in nursery before placement with surrogate at 15 days of age. Deceased at 17 days of age |
| 042-507   | DENV/ZIKV | Female | 1 day                                | Mother (biological)  |                                                                                                                                    |
| 042-505   | DENV/ZIKV | Female | 0 days                               | Mother (biological)  |                                                                                                                                    |
| 042-508   | DENV/ZIKV | Male   | 27 days                              | Nursery (peer group) | Biological mother rejected infant and no surrogates available.                                                                     |
| 042-506   | DENV/ZIKV | Female | 13 days                              | Mother (surrogate)   | Biological mother rejected infant                                                                                                  |

Supplemental Table S2. Test items included in each SNAP construct

| Orientation          | Motor Maturity & Activity | Sensory                   | State Control              |
|----------------------|---------------------------|---------------------------|----------------------------|
| Visual orientation   | Active power              | Calming self*             | Irritability               |
| Visual tracking      | Passive*                  | Rotation test             | Calming self*              |
| Duration of looking  | Coordination              | Parachute                 | Struggle during test*      |
| Attention            | Response speed            | One-minute vocalization** | Predominant state*         |
| Distractible*        | Motor activity            | Galants*                  | One-minute vocalizations** |
| Auditory Orientation | Maintenance balance       | Head posture prone        | Response intensity*        |
|                      | Spontaneous crawl         | Tactile response          | Soothability*              |
|                      |                           |                           | Consolability              |
|                      |                           |                           | Tremulousness*             |

|  |  |  |            |
|--|--|--|------------|
|  |  |  | Inversion* |
|--|--|--|------------|

\*reverse coded

\*\*vocalizations were converted into a number using number of vocalizations per minute

Supplemental Table S3. Test items included in SNAP Orientation construct subgroups

| Visual orientation        | Visual tracking           | Auditory orientation        | Focus               |
|---------------------------|---------------------------|-----------------------------|---------------------|
| Visual orientation- left  | Visual follow- horizontal | Auditory Orientation- right | Attention           |
| Visual orientation- right | Visual follow- vertical   | Auditory Orientation- left  | Distractible*       |
| Visual orientation- up    |                           |                             | Duration of looking |
| Visual orientation- down  |                           |                             |                     |

\*reverse coded

Supplemental Table S4. Infant age at SNAP administration

|                | Control         |      | ZIKV            |      | DENV/ZIKV       |      | p-value |
|----------------|-----------------|------|-----------------|------|-----------------|------|---------|
|                | Mean age (days) | SD   | Mean age (days) | SD   | Mean age (days) | SD   |         |
| Age at SNAP #1 | 6.75            | 0.96 | 7.00            | 1.22 | 6.88            | 1.13 | 0.95    |
| Age at SNAP #2 | 14.00           | 1.15 | 14.80           | 1.30 | 13.88           | 1.13 | 0.40    |
| Age at SNAP #3 | 21.50           | 1.00 | 21.60           | 0.55 | 20.57           | 0.98 | 0.12    |
| Age at SNAP #4 | 28.00           | 0.82 | 28.60           | 0.89 | 27.57           | 0.98 | 0.20    |

Standard deviation (SD)

Supplemental Table S5. SNAP Construct and Orientation construct subgroup descriptive statistics

| Construct/Orientation construct subgroup | Week of life | Group            | Median |
|------------------------------------------|--------------|------------------|--------|
| Orientation                              | 1            | Control          | 1.36   |
|                                          |              | ZIKV             | 1.19   |
|                                          |              | DENV/ZIKV        | 1.17   |
|                                          |              | ZIKV & DENV/ZIKV | 1.18   |
| Orientation                              | 2            | Control          | 1.40   |
|                                          |              | ZIKV             | 1.19   |
|                                          |              | DENV/ZIKV        | 1.47   |
|                                          |              | ZIKV & DENV/ZIKV | 1.33   |
| Orientation                              | 3            | Control          | 1.32   |
|                                          |              | ZIKV             | 1.33   |
|                                          |              | DENV/ZIKV        | 1.00   |
|                                          |              | ZIKV & DENV/ZIKV | 1.17   |
| Orientation                              | 4            | Control          | 1.63   |
|                                          |              | ZIKV             | 1.26   |
|                                          |              | DENV/ZIKV        | 0.66   |
|                                          |              | ZIKV & DENV/ZIKV | 0.96   |
| Motor Maturity and Activity              | 1            | Control          | 0.64   |
|                                          |              | ZIKV             | 0.49   |
|                                          |              | DENV/ZIKV        | 0.73   |
|                                          |              | ZIKV & DENV/ZIKV | 0.61   |

|                                                      |   |                  |      |
|------------------------------------------------------|---|------------------|------|
| Motor Maturity and Activity                          | 2 | Control          | 1.21 |
|                                                      |   | ZIKV             | 1.11 |
|                                                      |   | DENV/ZIKV        | 1.04 |
|                                                      |   | ZIKV & DENV/ZIKV | 1.08 |
| Motor Maturity and Activity                          | 3 | Control          | 1.30 |
|                                                      |   | ZIKV             | 1.41 |
|                                                      |   | DENV/ZIKV        | 1.26 |
|                                                      |   | ZIKV & DENV/ZIKV | 1.34 |
| Motor Maturity and Activity                          | 4 | Control          | 1.52 |
|                                                      |   | ZIKV             | 1.68 |
|                                                      |   | DENV/ZIKV        | 1.40 |
|                                                      |   | ZIKV & DENV/ZIKV | 1.54 |
| Sensory Responsiveness                               | 1 | Control          | 1.21 |
|                                                      |   | ZIKV             | 1.09 |
|                                                      |   | DENV/ZIKV        | 1.16 |
|                                                      |   | ZIKV & DENV/ZIKV | 1.13 |
| Sensory Responsiveness                               | 2 | Control          | 1.28 |
|                                                      |   | ZIKV             | 1.12 |
|                                                      |   | DENV/ZIKV        | 1.28 |
|                                                      |   | ZIKV & DENV/ZIKV | 1.20 |
| Sensory Responsiveness                               | 3 | Control          | 1.20 |
|                                                      |   | ZIKV             | 1.28 |
|                                                      |   | DENV/ZIKV        | 1.35 |
|                                                      |   | ZIKV & DENV/ZIKV | 1.32 |
| Sensory Responsiveness                               | 4 | Control          | 1.30 |
|                                                      |   | ZIKV             | 1.43 |
|                                                      |   | DENV/ZIKV        | 1.34 |
|                                                      |   | ZIKV & DENV/ZIKV | 1.39 |
| State Control                                        | 1 | Control          | 1.55 |
|                                                      |   | ZIKV             | 1.34 |
|                                                      |   | DENV/ZIKV        | 1.28 |
|                                                      |   | ZIKV & DENV/ZIKV | 1.31 |
| State Control                                        | 2 | Control          | 1.11 |
|                                                      |   | ZIKV             | 1.09 |
|                                                      |   | DENV/ZIKV        | 1.26 |
|                                                      |   | ZIKV & DENV/ZIKV | 1.17 |
| State Control                                        | 3 | Control          | 1.07 |
|                                                      |   | ZIKV             | 1.00 |
|                                                      |   | DENV/ZIKV        | 1.10 |
|                                                      |   | ZIKV & DENV/ZIKV | 1.05 |
| State Control                                        | 4 | Control          | 0.86 |
|                                                      |   | ZIKV             | 1.01 |
|                                                      |   | DENV/ZIKV        | 0.89 |
|                                                      |   | ZIKV & DENV/ZIKV | 0.95 |
| Orientation construct subgroup: Focus                | 4 | Control          | 1.4  |
|                                                      |   | ZIKV             | 1.2  |
|                                                      |   | DENV/ZIKV        | 0.5  |
|                                                      |   | ZIKV & DENV/ZIKV | 0.8  |
| Orientation construct subgroup: Visual Orientation   | 4 | Control          | 1.9  |
|                                                      |   | ZIKV             | 1.4  |
|                                                      |   | DENV/ZIKV        | 0.9  |
|                                                      |   | ZIKV & DENV/ZIKV | 1.1  |
| Orientation construct subgroup: Visual Tracking      | 4 | Control          | 1.8  |
|                                                      |   | ZIKV             | 1.4  |
|                                                      |   | DENV/ZIKV        | 0.5  |
|                                                      |   | ZIKV & DENV/ZIKV | 0.8  |
| Orientation construct subgroup: Auditory Orientation | 4 | Control          | 1.5  |
|                                                      |   | ZIKV             | 1.4  |
|                                                      |   | DENV/ZIKV        | 0.9  |
|                                                      |   | ZIKV & DENV/ZIKV | 1.1  |

Supplemental Table S6. SNAP construct and Orientation construct subgroup comparisons

| Construct/Orientation construct subgroup | Week of life | Group                  | p-value |
|------------------------------------------|--------------|------------------------|---------|
| Orientation                              | 1            | Ctrl vs ZIKV           | 0.8734  |
|                                          |              | Ctrl vs DENV/ZIKV      | 0.676   |
|                                          |              | ZIKV vs DENV/ZIKV      | 0.9723  |
|                                          |              | Ctrl vs ZIKV&DENV/ZIKV | 0.3555  |
| Orientation                              | 2            | Ctrl vs ZIKV           | 0.8046  |
|                                          |              | Ctrl vs DENV/ZIKV      | 0.9557  |
|                                          |              | ZIKV vs DENV/ZIKV      | 0.5519  |
|                                          |              | Ctrl vs ZIKV&DENV/ZIKV | 0.7552  |
| Orientation                              | 3            | Ctrl vs ZIKV           | 0.9914  |
|                                          |              | Ctrl vs DENV/ZIKV      | 0.3843  |
|                                          |              | ZIKV vs DENV/ZIKV      | 0.3095  |
|                                          |              | Ctrl vs ZIKV&DENV/ZIKV | 0.3663  |
| Orientation                              | 4            | Ctrl vs ZIKV           | 0.4795  |
|                                          |              | Ctrl vs DENV/ZIKV      | 0.0008  |
|                                          |              | ZIKV vs DENV/ZIKV      | 0.0359  |
|                                          |              | Ctrl vs ZIKV&DENV/ZIKV | 0.0035  |
| Motor Maturity and Activity              | 1            | Ctrl vs ZIKV           | 0.8736  |
|                                          |              | Ctrl vs DENV/ZIKV      | 0.9037  |
|                                          |              | ZIKV vs DENV/ZIKV      | 0.5703  |
|                                          |              | Ctrl vs ZIKV&DENV/ZIKV | 0.9954  |
| Motor Maturity and Activity              | 2            | Ctrl vs ZIKV           | 0.931   |
|                                          |              | Ctrl vs DENV/ZIKV      | 0.786   |
|                                          |              | ZIKV vs DENV/ZIKV      | 0.9806  |
|                                          |              | Ctrl vs ZIKV&DENV/ZIKV | 0.5223  |
| Motor Maturity and Activity              | 3            | Ctrl vs ZIKV           | 0.9499  |
|                                          |              | Ctrl vs DENV/ZIKV      | 0.9934  |
|                                          |              | ZIKV vs DENV/ZIKV      | 0.8813  |
|                                          |              | Ctrl vs ZIKV&DENV/ZIKV | 0.9266  |
| Motor Maturity and Activity              | 4            | Ctrl vs ZIKV           | 0.8782  |
|                                          |              | Ctrl vs DENV/ZIKV      | 0.9178  |
|                                          |              | ZIKV vs DENV/ZIKV      | 0.5955  |
|                                          |              | Ctrl vs ZIKV&DENV/ZIKV | 0.9868  |
| Sensory Responsiveness                   | 1            | Ctrl vs ZIKV           | 0.7793  |
|                                          |              | Ctrl vs DENV/ZIKV      | 0.8363  |

|                                                    |   |                        |        |
|----------------------------------------------------|---|------------------------|--------|
|                                                    |   | ZIKV vs DENV/ZIKV      | 0.9104 |
|                                                    |   | Ctrl vs ZIKV&DENV/ZIKV | 0.9586 |
| Sensory Responsiveness                             | 2 | Ctrl vs ZIKV           | 0.6297 |
|                                                    |   | Ctrl vs DENV/ZIKV      | 0.6792 |
|                                                    |   | ZIKV vs DENV/ZIKV      | 0.9996 |
|                                                    |   | Ctrl vs ZIKV&DENV/ZIKV | 0.5872 |
| Sensory Responsiveness                             | 3 | Ctrl vs ZIKV           | 0.7155 |
|                                                    |   | Ctrl vs DENV/ZIKV      | 0.8441 |
|                                                    |   | ZIKV vs DENV/ZIKV      | 0.6026 |
|                                                    |   | Ctrl vs ZIKV&DENV/ZIKV | 0.9463 |
| Sensory Responsiveness                             | 4 | Ctrl vs ZIKV           | 0.3308 |
|                                                    |   | Ctrl vs DENV/ZIKV      | 0.6705 |
|                                                    |   | ZIKV vs DENV/ZIKV      | 0.9566 |
|                                                    |   | Ctrl vs ZIKV&DENV/ZIKV | 0.7427 |
| State Control                                      | 1 | Ctrl vs ZIKV           | 0.8563 |
|                                                    |   | Ctrl vs DENV/ZIKV      | 0.3133 |
|                                                    |   | ZIKV vs DENV/ZIKV      | 0.7228 |
|                                                    |   | Ctrl vs ZIKV&DENV/ZIKV | 0.1846 |
| State Control                                      | 2 | Ctrl vs ZIKV           | 0.9851 |
|                                                    |   | Ctrl vs DENV/ZIKV      | 0.8625 |
|                                                    |   | ZIKV vs DENV/ZIKV      | 0.9523 |
|                                                    |   | Ctrl vs ZIKV&DENV/ZIKV | 0.7583 |
| State Control                                      | 3 | Ctrl vs ZIKV           | 1      |
|                                                    |   | Ctrl vs DENV/ZIKV      | 0.9981 |
|                                                    |   | ZIKV vs DENV/ZIKV      | 0.9987 |
|                                                    |   | Ctrl vs ZIKV&DENV/ZIKV | 0.8699 |
| State Control                                      | 4 | Ctrl vs ZIKV           | 0.69   |
|                                                    |   | Ctrl vs DENV/ZIKV      | 0.9981 |
|                                                    |   | ZIKV vs DENV/ZIKV      | 0.543  |
|                                                    |   | Ctrl vs ZIKV&DENV/ZIKV | 0.7698 |
| Orientation construct subgroup: Focus              | 1 | Ctrl vs ZIKV           | 0.6065 |
|                                                    |   | Ctrl vs DENV/ZIKV      | 0.003  |
|                                                    |   | ZIKV vs DENV/ZIKV      | 0.0116 |
|                                                    |   | Ctrl vs ZIKV&DENV/ZIKV | 0.0291 |
| Orientation construct subgroup: Visual Orientation | 2 | Ctrl vs ZIKV           | 0.2309 |
|                                                    |   | Ctrl vs DENV/ZIKV      | 0.0213 |

|                                                      |   |                        |        |
|------------------------------------------------------|---|------------------------|--------|
|                                                      |   | ZIKV vs DENV/ZIKV      | 0.4709 |
|                                                      |   | Ctrl vs ZIKV&DENV/ZIKV | 0.0385 |
| Orientation construct subgroup: Visual Tracking      | 3 | Ctrl vs ZIKV           | 0.1437 |
|                                                      |   | Ctrl vs DENV/ZIKV      | 0.0016 |
|                                                      |   | ZIKV vs DENV/ZIKV      | 0.1636 |
|                                                      |   | Ctrl vs ZIKV&DENV/ZIKV | 0.0057 |
| Orientation construct subgroup: Auditory Orientation | 4 | Ctrl vs ZIKV           | 0.7277 |
|                                                      |   | Ctrl vs DENV/ZIKV      | 0.1037 |
|                                                      |   | ZIKV vs DENV/ZIKV      | 0.2172 |
|                                                      |   | Ctrl vs ZIKV&DENV/ZIKV | 0.1897 |

Supplemental Table S7. Maternal-fetal interface tissue viral loads

| Group | Dam ID  | Cotyledon number | Tissue viral load (copies vRNA/mg) |          |          |
|-------|---------|------------------|------------------------------------|----------|----------|
|       |         |                  | Chorionic plate                    | Decidua  | Placenta |
| ZIKV  | 044-101 | 1a               | 0                                  | 43.3289  | 0        |
|       |         | 1b               | 0                                  | 3.8829   | 0        |
|       |         | 1c               | 1.833                              | 8.725    | 0        |
|       |         | 1d               | 0                                  | 0        | 0        |
|       |         | 1e               | 0                                  | 0        | 0        |
|       |         | 1f               | 0                                  | 0        | 0        |
|       |         | 1g               | 0                                  | 9.3513   | 0        |
|       |         | 1h               | 65.0844                            | 0        | 0        |
|       |         | 2a               | 731.1753                           | 0        | 0        |
|       |         | 2b               | 0                                  | 0        | 0        |
|       |         | 2c               | 1066.7979                          | 0        | 0        |
|       |         | 2d               | 19.3648                            | 9.5633   | 0.682    |
|       |         | 2e               | 0                                  | 0        | 0        |
|       |         | 2f               | 0                                  | 0        | 0        |
|       |         | 2g               | 0                                  | 179.4231 | 0        |
|       |         | 2h               | 0                                  | 0        | 0        |
|       |         | 2i               | 0                                  | 6.3418   | 0        |
|       |         | 2j               | 0                                  | 28.3216  | 0        |
|       |         | 2k               | 0                                  | 5.0091   | 0        |
|       |         | 2l               | 0.2786                             | 4.4686   | 10.5337  |
|       | 044-102 | 1a               | 0                                  | 0        | 0        |
|       |         | 1b               | 0                                  | 0        | 0        |
|       |         | 1c               | 0                                  | 0        | 0        |
|       |         | 1d               | 0                                  | 0        | 0        |
|       |         | 1e               | 0                                  | 0        | 0        |
|       |         | 1f               | 0                                  | 0        | 0        |
|       |         | 1g               | 0                                  | 0        | 0        |
|       |         | 1h               | 0                                  | 0        | 0        |
|       |         | 2a               | 0                                  | 0        | 0        |
|       |         | 2b               | 2016.4965                          | 0        | 0        |

|           |         |    |          |        |           |
|-----------|---------|----|----------|--------|-----------|
| DENV/ZIKV |         | 2c | 0        | 0      | 0         |
|           |         | 2d | 0        | 0      | 0         |
|           |         | 2e | 0        | 0      | 0         |
|           |         | 3a | 0        | 0      | 0         |
|           |         | 3b | 0        | 0      | 0         |
|           | 044-103 | 1a | 0        | 0      | 0         |
|           |         | 1b | 0        | 0      | 0         |
|           |         | 1c | 0        | 0      | 0         |
|           |         | 1d | 0        | 0      | 0         |
|           |         | 1e | 0        | 0      | 0         |
|           |         | 1f | 0        | 0      | 0         |
|           |         | 1g | 0        | 0      | 0         |
|           |         | 1h | 0        | 0      | 0         |
|           |         | 1j | 0        | 0      | 0         |
|           |         | 2a | 0        | 0      | 0         |
|           |         | 2b | 0        | 0      | 0         |
|           |         | 2c | 0        | 0      | 0         |
|           |         | 2d | 0        | 0      | 0         |
|           |         | 2e | 0        | 0      | 0         |
|           |         | 2f | 0        | 0      | 0         |
|           |         | 2g | NA       | 0      | 0         |
|           | 044-104 | 1a | 0        | 0      | 0         |
|           |         | 1b | 0        | 0      | 0         |
|           |         | 1c | 0        | 0      | 0         |
|           |         | 1d | 0        | 0      | 0         |
|           |         | 1e | 265.7528 | 0      | 0         |
|           |         | 1f | 0        | 0      | 0         |
|           |         | 2a | 0        | 0      | 0         |
|           |         | 2b | 0        | 0      | 0         |
|           |         | 2c | 0        | 0      | 0         |
|           |         | 2d | 0        | 0      | 0         |
|           |         | 2e | 0.1759   | 0      | 0         |
|           | 042-101 | 1a | 4.2132   | 0      | 0         |
|           |         | 1b | 0        | 0      | 0         |
|           |         | 1c | 8.2162   | NA     | 0         |
|           |         | 1d | 27.1164  | 0.172  | 0         |
|           |         | 1e | NA       | 0      | 0         |
|           |         | 1f | NA       | 0      | 0         |
|           |         | 1g | NA       | 0      | 0         |
|           |         | 1h | NA       | 0      | 0         |
|           |         | 2a | NA       | 0      | 1093.0121 |
|           |         | 2b | NA       | 0      | 59.3973   |
|           |         | 2c | 19.4595  | 3.095  | 0.248     |
|           |         | 2d | 40.694   | 0      | 13.2325   |
|           |         | 2e |          | 9.9504 | 0.3192    |
|           |         | 2f |          | 4.5233 | 0         |
|           | 042-102 | 1a | 0        | 0      | 0         |
|           |         | 1b | 0        | 0      | 0         |
|           |         | 1c | 0        | 0      | 0         |

|  |         |    |           |        |         |
|--|---------|----|-----------|--------|---------|
|  |         | 1d | NA        | 0      | 0       |
|  |         | 1e | NA        | 0      | 0       |
|  |         | 1f | NA        | 0      | 0       |
|  |         | 1g | NA        | 0      | 0       |
|  |         | 1h | NA        | 0      | 0       |
|  |         | 1j | NA        | 0      | 0       |
|  |         | 2a | NA        | 0      | 0       |
|  |         | 2b | NA        | 0      | 0       |
|  |         | 2c | NA        | 0      | 0       |
|  | 042-103 | 1a | 0         | 0      | 0       |
|  |         | 1b | 0         | 0      | 0       |
|  |         | 1c | NA        | 0      | 0.5355  |
|  |         | 1d | NA        | 0      | 0       |
|  |         | 1e | NA        | 1.7511 | 0       |
|  |         | 1f | NA        | 0      | 0       |
|  |         | 1g | NA        | 0      | 0       |
|  |         | 1h | NA        | 0      | 0       |
|  |         | 2a | 2.2832    | 0      | 0       |
|  |         | 2b | NA        | 0      | 0       |
|  |         | 2c | NA        | 0      | 0       |
|  |         | 2d | NA        | 0      | 0       |
|  |         | 2e | NA        | 0      | 0       |
|  |         | 2f | NA        | 0      | 53.8472 |
|  |         | 2g | NA        | 0      | 2.392   |
|  |         | 2h | NA        | 0      | 0       |
|  |         | 2i | NA        | 9.3524 | 0.0896  |
|  |         | 2j | NA        | NA     | 0       |
|  | 042-104 | 1a | 314.3516  | 0      | 0       |
|  |         | 1b | 1577.0798 | 0      | 19.43   |
|  |         | 1c | 0         | 0      | 0       |
|  |         | 1d | NA        | 0      | 0       |
|  |         | 1e | NA        | 0      | 0       |
|  |         | 1f | NA        | 0      | 0       |
|  |         | 2a | NA        | 0      | 0       |
|  |         | 2b | NA        | 0      | NA      |
|  |         | 2c | NA        | 0      | 0       |
|  |         | 2d | NA        | 0      | 0       |
|  |         | 2e | NA        | 0      | 0       |
|  |         | 2f | NA        | 0      | 0       |
|  |         | 2g | NA        | 0      | 0       |
|  |         | 2h | NA        | 0      | 0       |
|  |         | 2i | NA        | 0      | 0       |
|  | 042-105 | 1a | 0         | 0      | 0       |
|  |         | 1b | 0         | 0      | 0       |
|  |         | 1c | 0         | 0      | 0       |
|  |         | 1d | 0         | 0      | 0.0501  |
|  |         | 1e | 0         | 0      | 0       |
|  |         | 1f | 0         | 0      | 0       |
|  |         | 1g | 0         | 0      | 0.2537  |



|  |         |    |        |         |         |
|--|---------|----|--------|---------|---------|
|  |         | 1h | 0      | 0       | 0.0219  |
|  |         | 1j | 0      | 0       | 1.0868  |
|  |         | 2a | 0      | 0       | 0.1007  |
|  |         | 2b | 0      | 22.1242 | 0.0954  |
|  |         | 2c | 0      | 0       | 5.5103  |
|  |         | 2d | 0      | 0       | 0       |
|  |         | 2e | 0      | 0       | 0       |
|  |         | 2f | 0      | 0       | 0       |
|  | 042-106 | 1a | 0      | 0       | 0       |
|  |         | 1b | 0      | 0       | 0       |
|  |         | 1c | 0      | 0       | 0       |
|  |         | 1d | 0      | 0       | 0       |
|  |         | 1e | 0      | 0       | 0       |
|  |         | 1f | 0      | 0       | 0       |
|  |         | 1g | 0      | 0       | 0       |
|  |         | 1h | 0      | 0       | 0       |
|  |         | 1j | 0      | 0       | 0       |
|  |         | 2a | 0      | 0       | 0       |
|  |         | 2b | 0      | 0       | 0       |
|  |         | 2c | 0      | 0       | 0       |
|  |         | 2d | 0      | 0       | 0       |
|  |         | 2e | 0      | 0       | 0       |
|  | 042-107 | 1a | 0      | 0       | 0       |
|  |         | 1b | 0      | 0       | 0       |
|  |         | 1c | 0      | 0       | 0.1904  |
|  |         | 1d | 3.6486 | 7.2762  | 0.0771  |
|  |         | 1e | 0      | 0       | 0       |
|  |         | 1f | 0      | 0       | 0       |
|  |         | 1g | 0      | 0       | 0       |
|  |         | 2a | 0      | 0       | 0       |
|  |         | 2b | 0      | 0       | 6       |
|  |         | 2c | 0      | 0       | 0       |
|  |         | 2d | 0      | 0       | 0       |
|  |         | 2e | 0      | 0       | 0       |
|  |         | 2f | 1.7155 | 0       | 14.3468 |
|  |         | 2g | 0      | 0       | 0       |
|  | 042-108 | 1a | 0      | 0       | 0       |
|  |         | 1b | 0      | 0       | 0       |
|  |         | 1c | 0      | 0       | 0       |
|  |         | 1d | 0      | 0       | 0       |
|  |         | 1e | 0      | 0       | 0       |
|  |         | 1f | 0      | 0       | 0       |
|  |         | 1g | 0      | 0       | 0       |
|  |         | 2a | 0      | 0       | 0       |
|  |         | 2b | 0      | 0       | 0       |
|  |         | 2c | 0      | 0       | 0       |
|  |         | 2d | 0      | 0       | 0       |
|  |         | 2e | 0      | 0       | 0       |
|  |         | 2f | 0      | 0       | 0       |

|  |  |    |   |   |   |
|--|--|----|---|---|---|
|  |  | 2g | 0 | 0 | 0 |
|  |  | 2h | 0 | 0 | 0 |

Supplemental Table S8. Maternal ZIKV infection characteristics descriptive statistics

| Maternal viremia parameter                                  | Group            | Median (Range)    |     |
|-------------------------------------------------------------|------------------|-------------------|-----|
| Peak Viral Load                                             | ZIKV             | 4.1 (3.6-6.0)     |     |
|                                                             | DENV/ZIKV        | 5.1 (3.9-5.8)     |     |
| Viremia Duration                                            | ZIKV             | 10.0 (6.0-84.0)   |     |
|                                                             | DENV/ZIKV        | 44.0 (6.0-77.0)   |     |
| Placental vRNA+/total cotyledons (%)                        | Control          | 0.0% (0.0-0.0%)   |     |
|                                                             | ZIKV             | 0.0% (0.0-5.0%)   |     |
|                                                             | DENV/ZIKV        | 12.2% (0.0-43.8%) |     |
|                                                             | ZIKV & DENV/ZIKV | 2.5% (0.0-43.8%)  |     |
| Decidua vRNA+/total cotyledons (%)                          | Control          | 0.0% (0.0-0.0%)   |     |
|                                                             | ZIKV             | 0.0% (0.0-45.0%)  |     |
|                                                             | DENV/ZIKV        | 0.0% (0.0-23.1%)  |     |
|                                                             | ZIKV & DENV/ZIKV | 0.0% (0.0-45.0%)  |     |
| Chorionic plate vRNA+/total cotyledons (%)                  | Control          | 0.0% (0.0-0.0%)   |     |
|                                                             | ZIKV             | 6.7% (0.0-25.0%)  |     |
|                                                             | DENV/ZIKV        | 7.1% (0.0-83.3%)  |     |
|                                                             | ZIKV & DENV/ZIKV | 6.7% (0.0-83.3%)  |     |
|                                                             |                  | N                 | %   |
| Viremia duration greater than 21 days (number >21 days (%)) | ZIKV             | 1                 | 20% |
|                                                             | DENV/ZIKV        | 5                 | 63% |

Supplemental Table S9. Dam and infant ZIKV infection and health parameter group comparisons

| Outcome                               | Comparison             | p-value |
|---------------------------------------|------------------------|---------|
| Peak Viral Load                       | ZIKV vs DENV/ZIKV      | 0.4208  |
| Viremia Duration                      | ZIKV vs DENV/ZIKV      | 0.463   |
| Viremia duration greater than 21 days | ZIKV vs DENV/ZIKV      | 0.266   |
| Placental vRNA+/total cotyledons      | Ctrl vs ZIKV           | 0.4533  |
|                                       | Ctrl vs DENV/ZIKV      | 0.072   |
|                                       | ZIKV vs DENV/ZIKV      | 0.147   |
|                                       | Ctrl vs ZIKV&DENV/ZIKV | 0.1091  |
| Decidua vRNA+/total cotyledons        | Ctrl vs ZIKV           | 0.4533  |
|                                       | Ctrl vs DENV/ZIKV      | 0.2202  |
|                                       | ZIKV vs DENV/ZIKV      | 0.9999  |

|                                               |                           |        |
|-----------------------------------------------|---------------------------|--------|
|                                               | Ctrl vs<br>ZIKV&DENV/ZIKV | 0.2322 |
| Chorionic membrane vRNA+/total<br>cotyledons  | Ctrl vs ZIKV              | 0.1859 |
|                                               | Ctrl vs DENV/ZIKV         | 0.1296 |
|                                               | ZIKV vs DENV/ZIKV         | 0.6504 |
|                                               | Ctrl vs<br>ZIKV&DENV/ZIKV | 0.1091 |
| CHIV+/ total cotyledons (Present %)           | Ctrl vs ZIKV              | 0.9999 |
|                                               | Ctrl vs DENV/ZIKV         | 0.9999 |
|                                               | ZIKV vs DENV/ZIKV         | 0.9999 |
|                                               | Ctrl vs<br>ZIKV&DENV/ZIKV | 0.9999 |
| Villous Stromal Calcifications<br>(Present %) | Ctrl vs ZIKV              | 0.4286 |
|                                               | Ctrl vs DENV/ZIKV         | 0.9999 |
|                                               | ZIKV vs DENV/ZIKV         | 0.2364 |
|                                               | Ctrl vs<br>ZIKV&DENV/ZIKV | 0.5286 |
| Placental weight                              | Ctrl vs ZIKV              | 0.3123 |
|                                               | Ctrl vs DENV/ZIKV         | 0.7989 |
|                                               | ZIKV vs DENV/ZIKV         | 0.0745 |
|                                               | Ctrl vs<br>ZIKV&DENV/ZIKV | 0.8557 |
| Vasculopathy (present %)                      | Ctrl vs ZIKV              | 0.9999 |
|                                               | Ctrl vs DENV/ZIKV         | 0.9999 |
|                                               | ZIKV vs DENV/ZIKV         | 0.9999 |
|                                               | Ctrl vs<br>ZIKV&DENV/ZIKV | 0.4500 |
| Infarctions/total cotyledons                  | Control                   | 0.7715 |
|                                               | ZIKV                      | 0.3949 |
|                                               | DENV/ZIKV                 | 0.67   |
|                                               | ZIKV & DENV/ZIKV          | 0.4289 |
| Birthweight                                   | Ctrl vs ZIKV              | 0.22   |
|                                               | Ctrl vs DENV/ZIKV         | 0.9174 |
|                                               | ZIKV vs DENV/ZIKV         | 0.1266 |
|                                               | Ctrl vs<br>ZIKV&DENV/ZIKV | 0.6353 |
| 1st month growth trajectory                   | Ctrl vs ZIKV              | 0.8977 |
|                                               | Ctrl vs DENV/ZIKV         | 0.522  |
|                                               | ZIKV vs DENV/ZIKV         | 0.6908 |
|                                               | Ctrl vs<br>ZIKV&DENV/ZIKV | 0.6295 |
| Apgar score: 1 min                            | Ctrl vs ZIKV              | 0.8641 |
|                                               | Ctrl vs DENV/ZIKV         | 0.9993 |
|                                               | ZIKV vs DENV/ZIKV         | 0.8194 |
|                                               | Ctrl vs<br>ZIKV&DENV/ZIKV | 0.8145 |
| Apgar score: 5 min                            | Ctrl vs ZIKV              | 0.8941 |
|                                               | Ctrl vs DENV/ZIKV         | 0.8674 |

|                     |                        |        |
|---------------------|------------------------|--------|
| Apgar score: 10 min | ZIKV vs DENV/ZIKV      | 0.9999 |
|                     | Ctrl vs ZIKV&DENV/ZIKV | 0.5849 |
|                     | Ctrl vs ZIKV           | 0.9443 |
|                     | Ctrl vs DENV/ZIKV      | 0.8307 |
|                     | ZIKV vs DENV/ZIKV      | 0.9684 |
|                     | Ctrl vs ZIKV&DENV/ZIKV | 0.5849 |

Supplemental Table S10. Fetal growth parameter trajectories

| Groups in comparison                      | Fetal and placental parameter     | Group            | Slope   | 95% CI Slope    | p-value* |
|-------------------------------------------|-----------------------------------|------------------|---------|-----------------|----------|
| Controls, ZIKV, DENV/ZIKV                 | Biparietal diameter (BPD) z-score | Control          | -0.0008 | -0.0014--0.0003 | 0.0036   |
|                                           |                                   | ZIKV             | 0       | -0.0005-0.0006  | 0.8886   |
|                                           |                                   | DENV/ZIKV        | -0.0003 | -0.0007-0.0001  | 0.124    |
|                                           | Femur length z-score              | Control          | -0.0008 | -0.0023-0.0008  | 0.3264   |
|                                           |                                   | ZIKV             | 0.0007  | -0.0009-0.0022  | 0.3757   |
|                                           |                                   | DENV/ZIKV        | -0.0011 | -0.0023-0.0001  | 0.0612   |
|                                           | Abdominal circumference z-score   | Control          | -0.0004 | -0.0012-0.0003  | 0.2347   |
|                                           |                                   | ZIKV             | 0.0005  | -0.0003-0.0012  | 0.2225   |
|                                           |                                   | DENV/ZIKV        | -0.0003 | -0.0008-0.0003  | 0.3331   |
|                                           | Head Circumference (HC) z-score   | Control          | -0.0001 | -0.0005-0.0004  | 0.7939   |
|                                           |                                   | ZIKV             | 0.0006  | 0.0001-0.0011   | 0.018    |
|                                           |                                   | DENV/ZIKV        | 0       | -0.0004-0.0003  | 0.8462   |
|                                           | BPD/Femur (log-scale)             | Control          | -0.0029 | -0.004--0.0017  | <0.0001  |
|                                           |                                   | ZIKV             | -0.0026 | -0.0036--0.0016 | <0.0001  |
|                                           |                                   | DENV/ZIKV        | -0.0026 | -0.0035--0.0017 | <0.0001  |
| Controls, ZIKV&DENV/ZIKV animals combined | Biparietal diameter z-score       | Control          | 0.0008  | -0.0014--0.0003 | 0.0036   |
|                                           |                                   | ZIKV & DENV/ZIKV | 0.0002  | -0.0005-0.0001  | 0.2627   |
|                                           | Femur length z-score              | Control          | 0.0008  | -0.0023-0.0008  | 0.3289   |
|                                           |                                   | ZIKV & DENV/ZIKV | 0.0005  | -0.0014-0.0005  | 0.3263   |
|                                           | Abdominal circumference z-score   | Control          | 0.0004  | -0.0012-0.0003  | 0.2382   |
|                                           |                                   | ZIKV & DENV/ZIKV | 0       | -0.0004-0.0004  | 0.9803   |
|                                           | Head Circumference z-score        | Control          | 0.0001  | -0.0005-0.0004  | 0.7915   |
|                                           |                                   | ZIKV & DENV/ZIKV | 0.0002  | -0.0001-0.0005  | 0.2089   |
|                                           | BPD/Femur (log-scale)             | Control          | 0.0029  | -0.0041--0.0017 | <0.0001  |
|                                           |                                   | ZIKV & DENV/ZIKV | 0.0026  | -0.0034--0.0018 | <0.0001  |
|                                           | HC/Femur (log-scale)              | Control          | 0.0018  | -0.0028--0.0008 | <0.0007  |
|                                           |                                   | ZIKV & DENV/ZIKV | 0.0019  | -0.0026--0.0012 | <0.0001  |

\*comparison to normative fetal growth parameters in a Z-score analysis, where slope = 0

Supplemental Table S11. Fetal growth trajectory group comparisons

| Groups in comparison                                 | Fetal and placental parameter     | Comparison                  | p-value |
|------------------------------------------------------|-----------------------------------|-----------------------------|---------|
| Group comparison:<br>control vs ZIKV vs<br>DENV/ZIKV | Biparietal diameter (BPD) z-score | Control vs ZIKV             | 0.0308  |
|                                                      |                                   | Control vs DENV/ZIKV        | 0.154   |
|                                                      |                                   | ZIKV vs DENV/ZIKV           | 0.3023  |
|                                                      | Femur length z-score              | Control vs ZIKV             | 0.1871  |
|                                                      |                                   | Control vs DENV/ZIKV        | 0.7385  |
|                                                      |                                   | ZIKV vs DENV/ZIKV           | 0.0674  |
|                                                      | Abdominal circumference z-score   | Control vs ZIKV             | 0.0891  |
|                                                      |                                   | Control vs DENV/ZIKV        | 0.7021  |
|                                                      |                                   | ZIKV vs DENV/ZIKV           | 0.1202  |
|                                                      | Head Circumference (HC) z-score   | Control vs ZIKV             | 0.0585  |
|                                                      |                                   | Control vs DENV/ZIKV        | 0.9345  |
|                                                      |                                   | ZIKV vs DENV/ZIKV           | 0.046   |
|                                                      | BPD/Femur(log-scale)              | Control vs ZIKV             | 0.6893  |
|                                                      |                                   | Control vs DENV/ZIKV        | 0.619   |
|                                                      |                                   | ZIKV vs DENV/ZIKV           | 0.9673  |
| Group comparison:<br>control vs ZIKV &<br>DENV/ZIKV  | HC/Femur(log-scale)               | Control vs ZIKV             | 0.892   |
|                                                      |                                   | Control vs DENV/ZIKV        | 0.6021  |
|                                                      |                                   | ZIKV vs DENV/ZIKV           | 0.5059  |
|                                                      | Biparietal diameter z-score       | Control vs ZIKV & DENV/ZIKV | 0.0531  |
|                                                      | Femur length z-score              | Control vs ZIKV & DENV/ZIKV | 0.7362  |
|                                                      | Abdominal circumference z-score   | Control vs ZIKV & DENV/ZIKV | 0.3164  |
|                                                      | Head Circumference z-score        | Control vs ZIKV & DENV/ZIKV | 0.3691  |
|                                                      | BPD/Femur(log-scale)              | Control vs ZIKV & DENV/ZIKV | 0.584   |
|                                                      | HC/Femur(log-scale)               | Control vs ZIKV & DENV/ZIKV | 0.7538  |

Supplemental Table S12. Maternal-fetal interface tissue descriptive statistics

|                                            | Group            | Median (range) or % for Absent/present |
|--------------------------------------------|------------------|----------------------------------------|
| CHIV+/ total cotyledons (Present %)        | Control          | 0.0% (0/4)                             |
|                                            | ZIKV             | 0.0% (0/4)                             |
|                                            | DENV/ZIKV        | 12.5% (1/8)                            |
|                                            | ZIKV & DENV/ZIKV | 8.3% (1/12)                            |
| Villous Stromal Calcifications (Present %) | Control          | 100.0% (4/4)                           |
|                                            | ZIKV             | 50.0% (2/4)                            |
|                                            | DENV/ZIKV        | 87.5% (7/8)                            |
|                                            | ZIKV & DENV/ZIKV | 75% (9/12)                             |
| Placental weight (g)                       | Control          | 117 (107-145)                          |
|                                            | ZIKV             | 129 (120-173)                          |
|                                            | DENV/ZIKV        | 120 (95-140)                           |
|                                            | ZIKV & DENV/ZIKV | 120 (95-1733)                          |
| Vasculopathy (present %)                   | Control          | 25.0% (1/4)                            |
|                                            | ZIKV             | 0.0% (0/4)                             |
|                                            | DENV/ZIKV        | 12.5% (1/8)                            |
|                                            | ZIKV & DENV/ZIKV | 8.3% (1/12)                            |
| Infarctions/total cotyledons               | Control          | 9.2% (0.0-45.5%)                       |
|                                            | ZIKV             | 21.6% (0.0-40.0%)                      |
|                                            | DENV/ZIKV        | 25.8% (0.0-53.3%)                      |

|  |                  |                   |
|--|------------------|-------------------|
|  | ZIKV & DENV/ZIKV | 25.0% (0.0-53.3%) |
|--|------------------|-------------------|

Supplemental Table S13. Apgar score descriptive statistics

|                     | Group            | Mean | 95% CI   |
|---------------------|------------------|------|----------|
| Apgar score: 1 min  | Ctrl             | 5.3  | 3.3-7.3  |
|                     | ZIKV             | 6    | 4.3-7.7  |
|                     | DENV/ZIKV        | 5.4  | 4.1-6.6  |
|                     | ZIKV & DENV/ZIKV | 5.6  | 4.6-6.6  |
| Apgar score: 5 min  | Ctrl             | 6.7  | 4.7-8.7  |
|                     | ZIKV             | 7.3  | 5.5-9.0  |
|                     | DENV/ZIKV        | 7.3  | 6.0-8.5  |
|                     | ZIKV & DENV/ZIKV | 7.3  | 6.3-8.2  |
| Apgar score: 10 min | Ctrl             | 8.3  | 6.3-10.3 |
|                     | ZIKV             | 8.8  | 7.0-10.5 |
|                     | DENV/ZIKV        | 9    | 7.8-10.2 |
|                     | ZIKV & DENV/ZIKV | 8.9  | 7.9-9.9  |

Supplemental Table S14. Infant weight gain descriptive statistics

| Group          | Birthweight (week 0) mean | Birthweight 95% CI | 1st month weight gain trajectory | 1st month weight gain trajectory 95% CI |
|----------------|---------------------------|--------------------|----------------------------------|-----------------------------------------|
| Control        | 0.48                      | 0.43-0.54          | 0.02                             | 0.005-0.0352                            |
| ZIKV           | 0.53                      | 0.48-0.58          | 0.022                            | 0.008-0.0249                            |
| DENV/ZIKV      | 0.48                      | 0.44-0.52          | 0.026                            | 0.0150-0.0369                           |
| ZIKV&DENV/ZIKV | 0.5                       | 0.47-0.53          | 0.024                            | 0.016-0.0327                            |

Supplemental Table S15. Neonatal body fluid viral loads

| Infant ID | Treatment group | Age (days) | ZIKV vRNA copies/ml in plasma | ZIKV vRNA copies/ml in urine |
|-----------|-----------------|------------|-------------------------------|------------------------------|
| 042-504   | DENV/ZIKV       | 0          | 0                             | NA                           |
| 042-502   | DENV/ZIKV       | 0          | 0                             | NA                           |
| 042-501   | DENV/ZIKV       | 3          | 0                             | NA                           |
| 042-503   | DENV/ZIKV       | 0          | 0                             | in process                   |
| 042-507   | DENV/ZIKV       | 0          | 0                             | NA                           |
| 042-505   | DENV/ZIKV       | 0          | 0                             | in process                   |
| 042-508   | DENV/ZIKV       | 0          | 0                             | 0                            |
| 042-506   | DENV/ZIKV       | 0          | 0                             | NA                           |
| 044-504   | ZIKV only       | 0          | 0                             | 0                            |
| 044-503   | ZIKV only       | 0          | 0                             | 0                            |
| 044-502   | ZIKV only       | 0          | 0                             | 0                            |
| 044-501   | ZIKV only       | 0          | 0                             | 0                            |
| 044-509   | ZIKV only       | 7          | 0                             | NA                           |

Not available (NA)
